# Supplementary material for: Pipette tip-based molecularly imprinted monolith for selective micro-solid-phase extraction of methomyl in environmental water
Source: Royal Society of Chemistry journal article supplement (doi:10.1039/c4ay00766b), 2014-01-01
Supplement: c4ay00766b1.pdf [file c4ay00766b1.pdf]

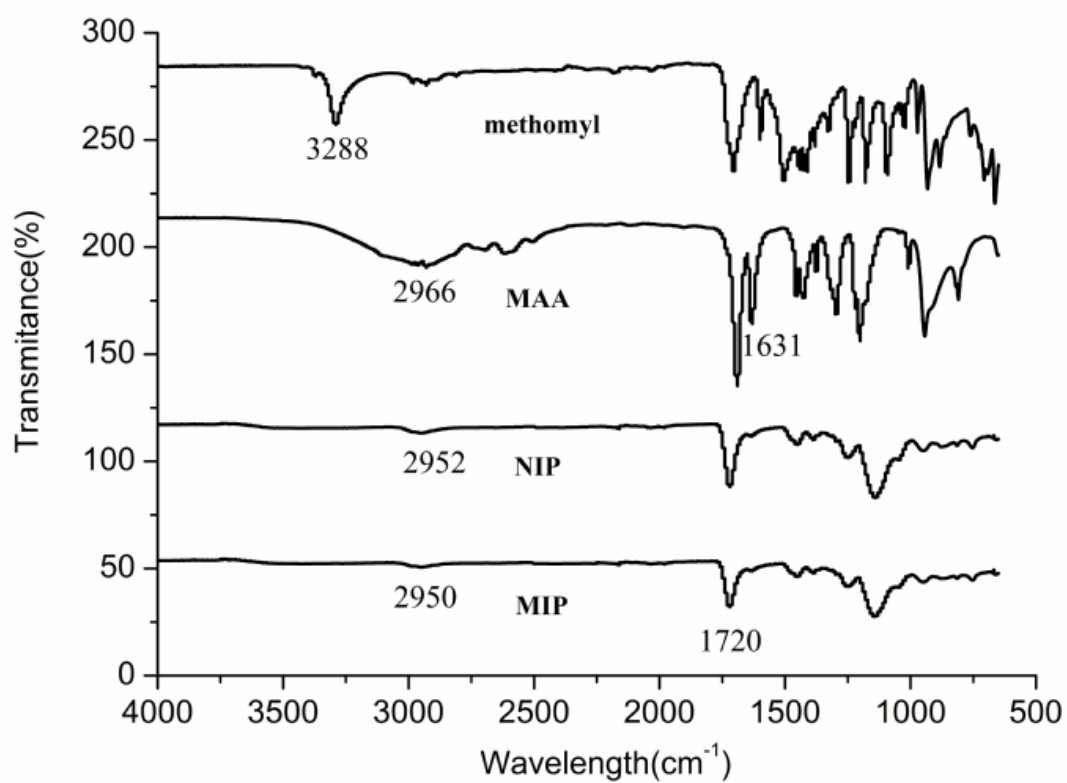

**Fig. 1S.** FT-IR spectra of methomyl, MAA, MIP and NIP.

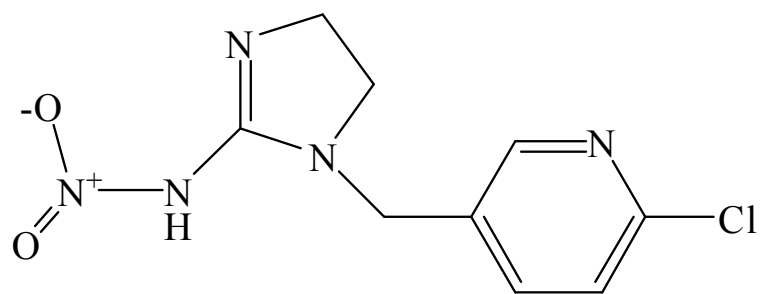

Imidacloprid

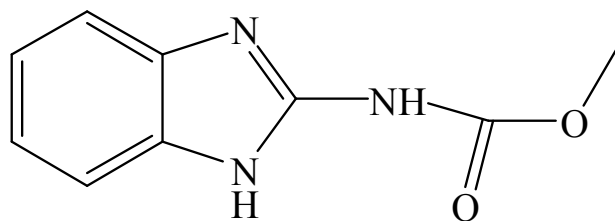

Carbendazim

**Fig. 2S.** The molecule structure of imidacloprid and carbendazim

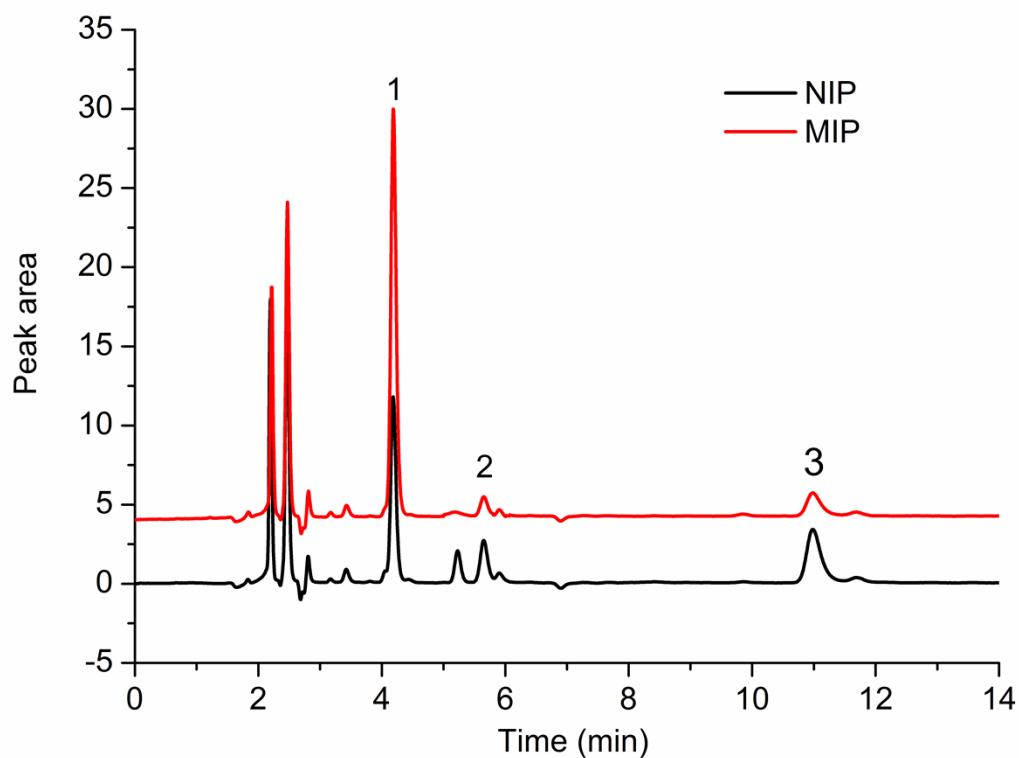

**Fig. 3S.** HPLC chromatograms of mixed methomyl, imidacloprid and carbendazim standard solutions at concentration level  $200 \text{ ng mL}^{-1}$ . Sample injection was performed using: (1) NIM- $\mu$ -SPE and (2) MIM- $\mu$ -SPE. Extraction conditions: sample volume, 1mL; eluent, 60  $\mu\text{L}$  of acetonitrile; sample flow rate,  $0.15 \text{ mL min}^{-1}$ . HPLC conditions: mobile phase,  $\text{CH}_3\text{OH-H}_2\text{O}$  (40:60 v/v).

1. methomyl, 2. imidacloprid, 3. carbendazim.

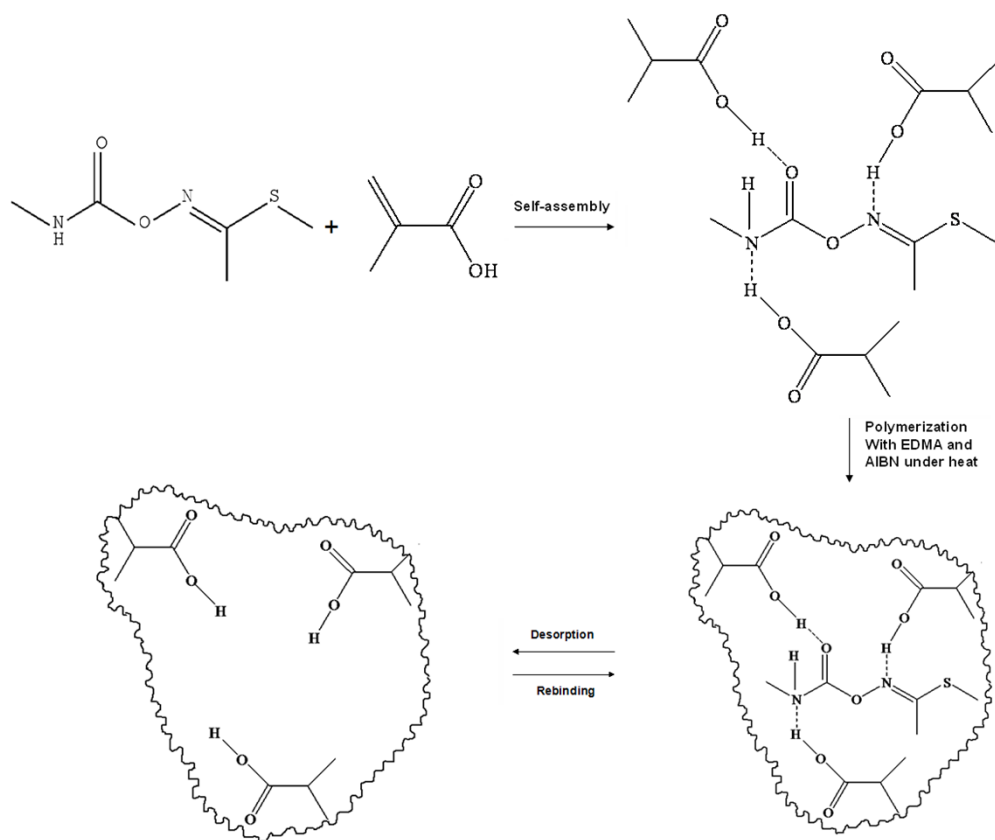

**Fig. 4S** The illustration of the MIM and its molecular recognition
